# Supplementary material for: The Gene Signature Associated with Hepatocellular Carcinoma in Patients with Nonalcoholic Fatty Liver Disease
Source: Hindawi journal article supplement (doi:10.1155/2021/6630535), 2021-04-02

A

### Turquoise module in HCC VS. yellow module in NAFLD

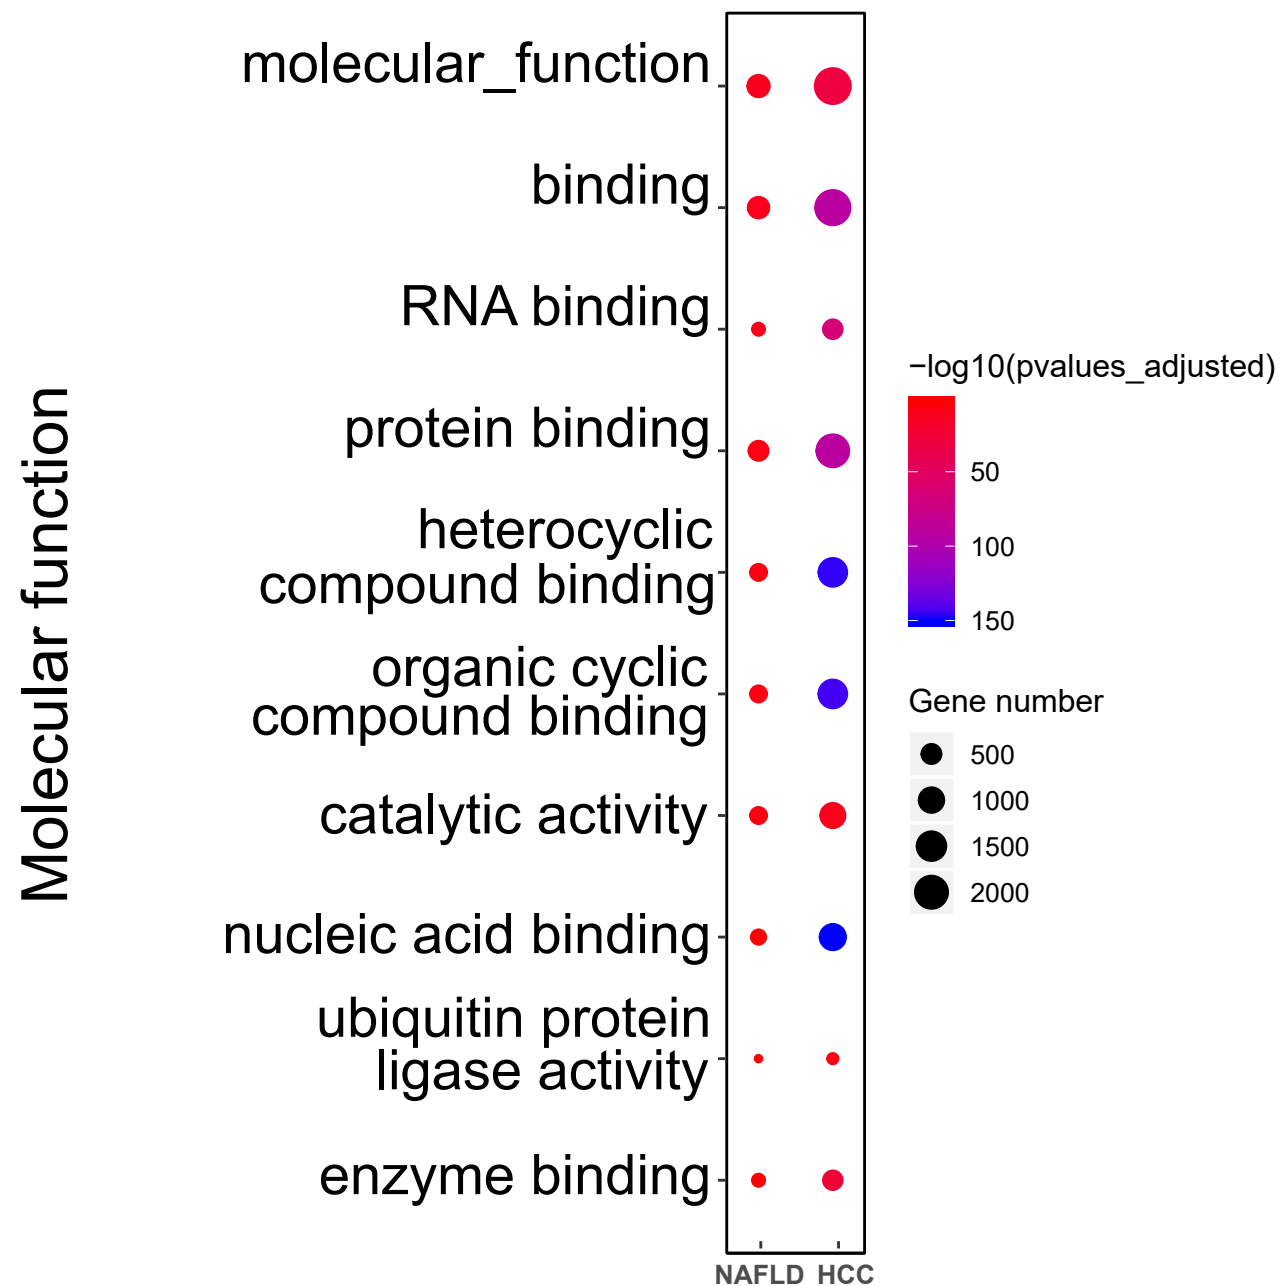

B

### Brown module in HCC VS. yellow module in NAFLD

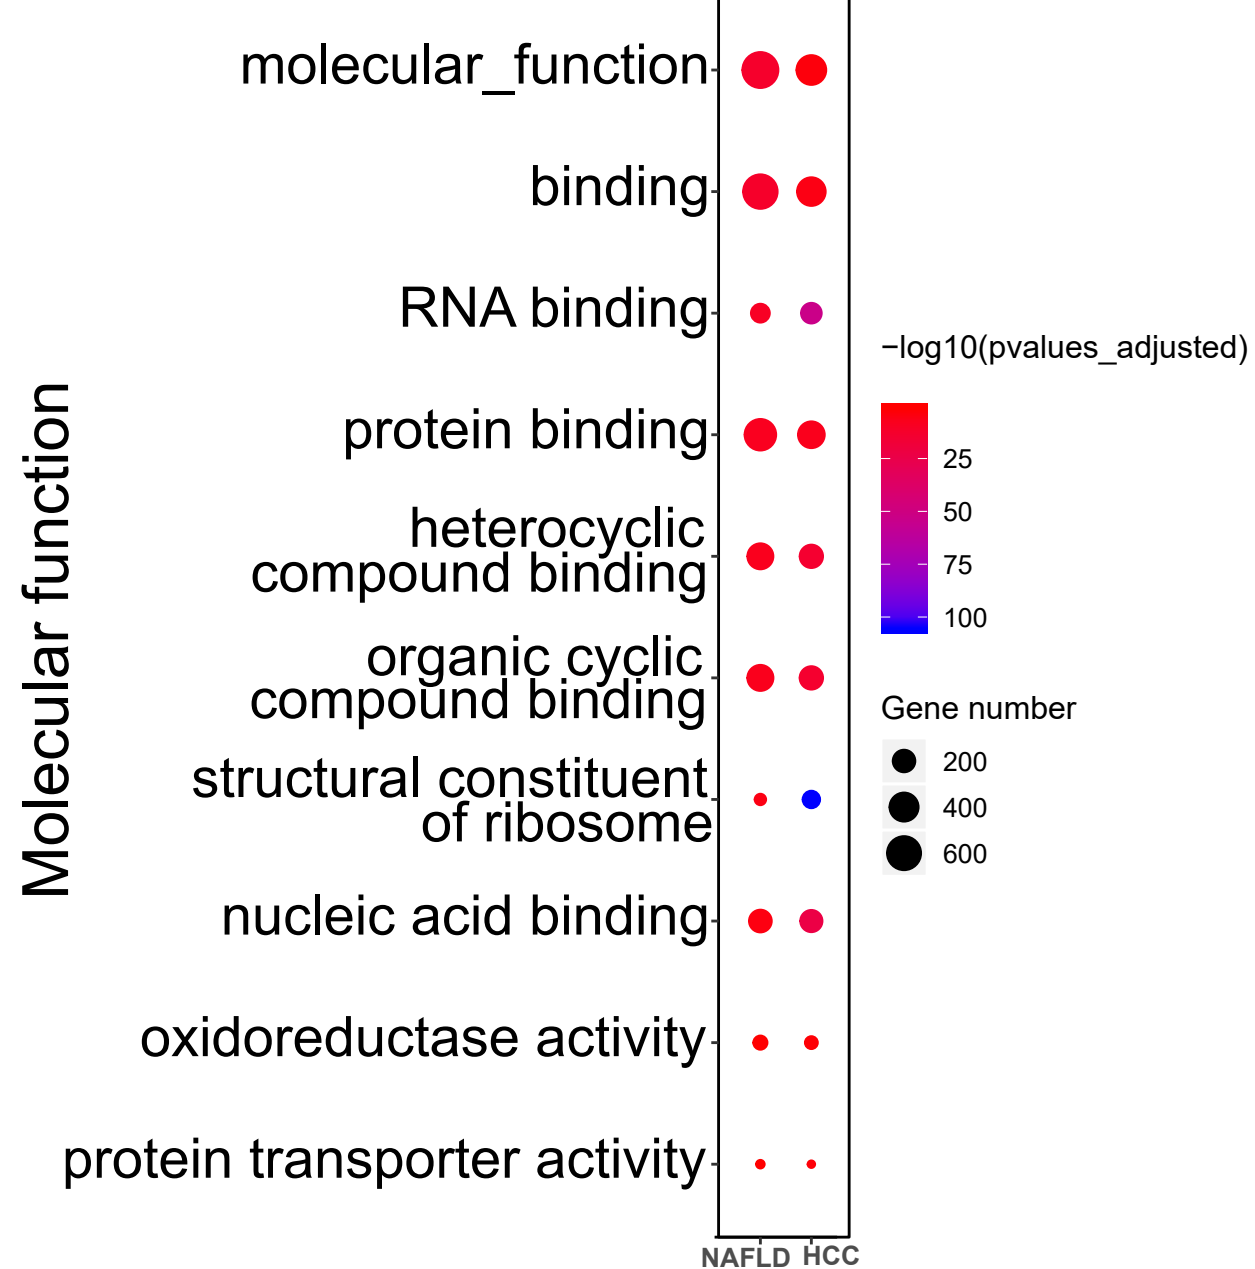

C

### Turquoise module in HCC VS. yellow module in NAFLD

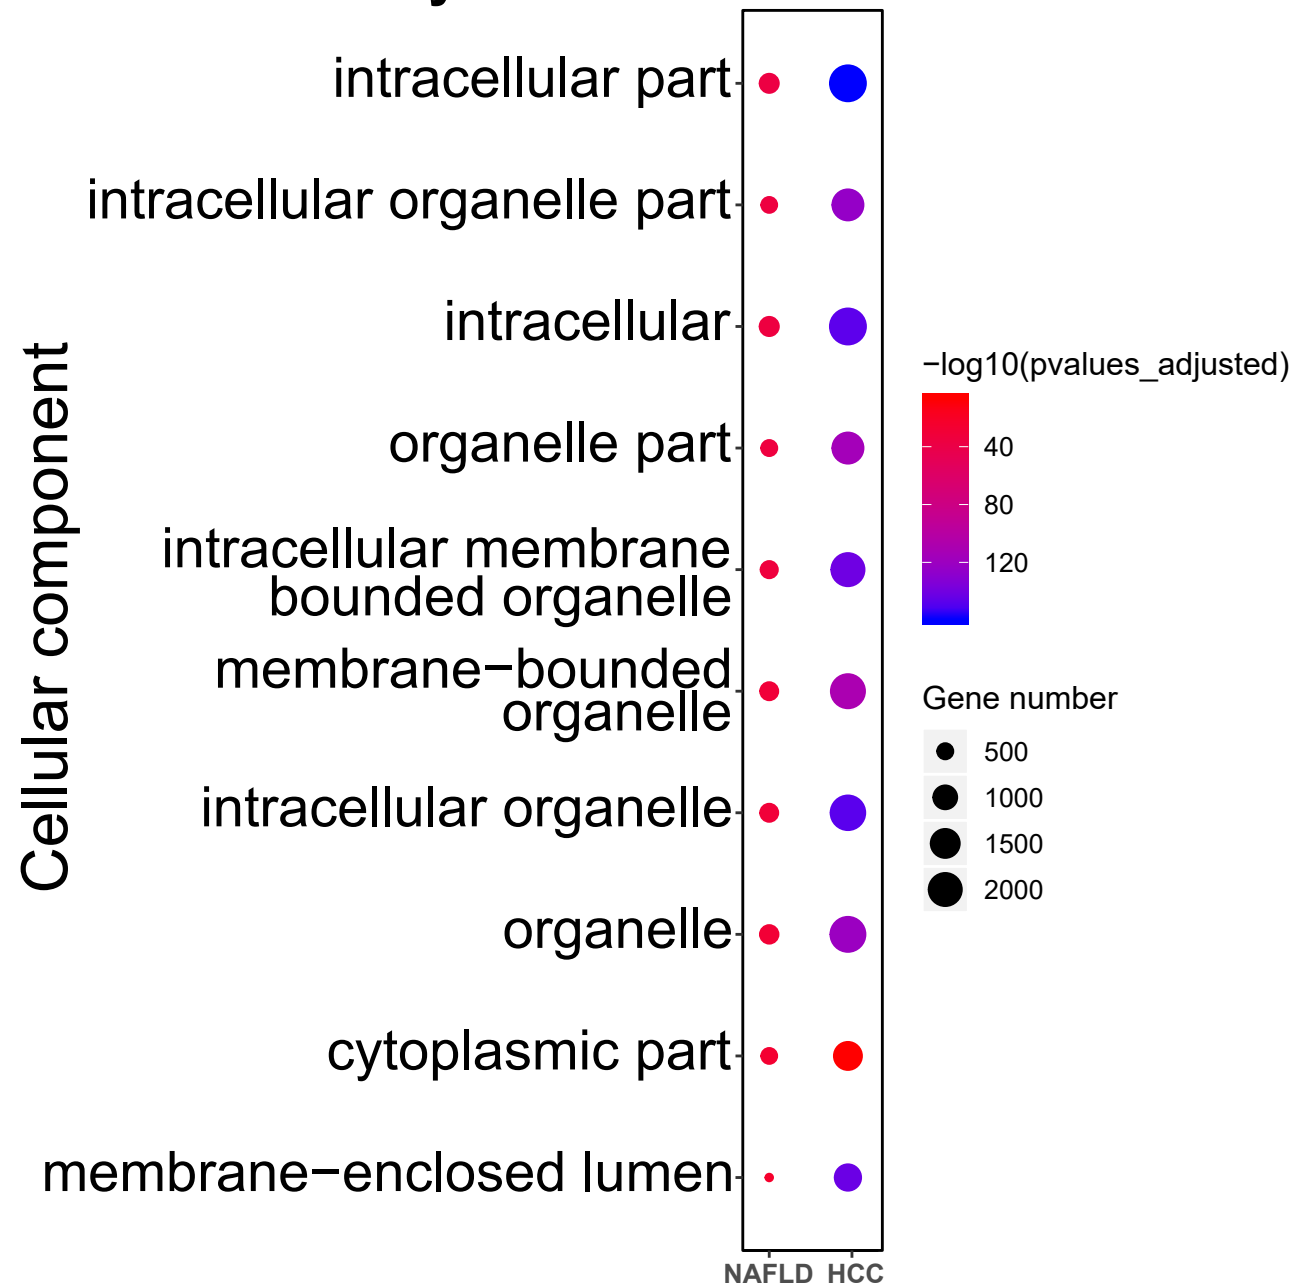

D

### Brown module in HCC VS. yellow module in NAFLD

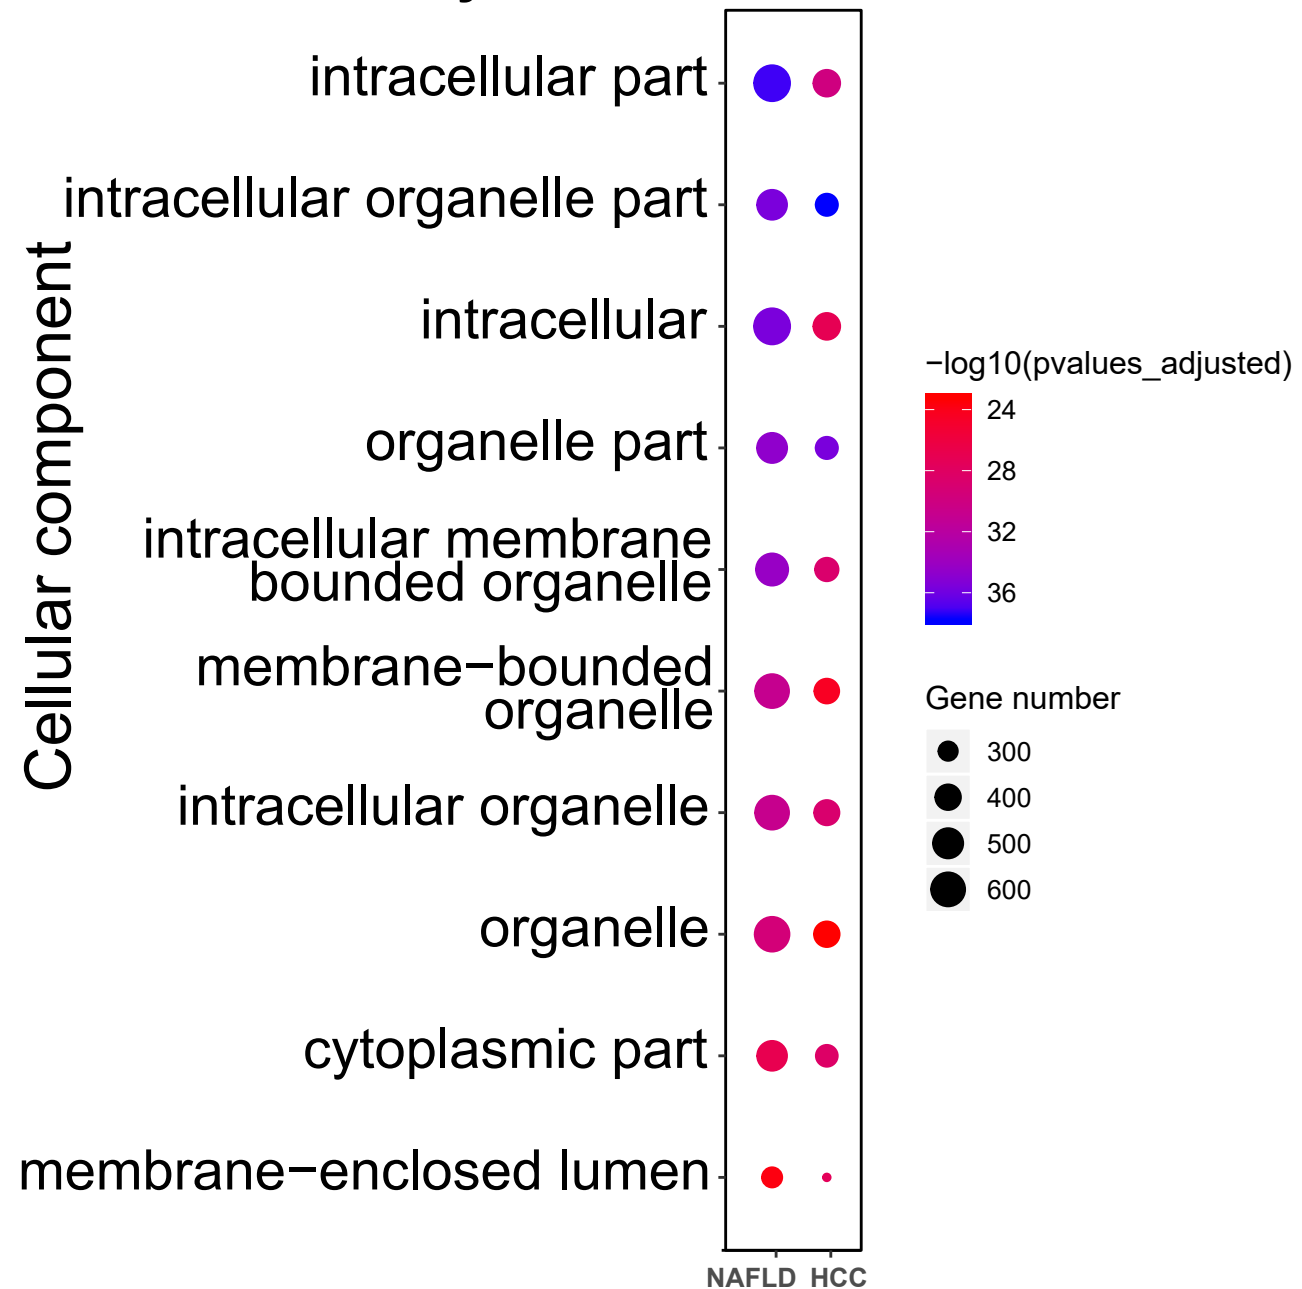

Supplement: f1 [file 6630535.f1.zip]
