# Supplementary figures and images for: The Gene Signature Associated with Hepatocellular Carcinoma in Patients with Nonalcoholic Fatty Liver Disease
Source: Hindawi journal article supplement (doi:10.1155/2021/6630535), 2021-04-02

# Cluster Dendrogram

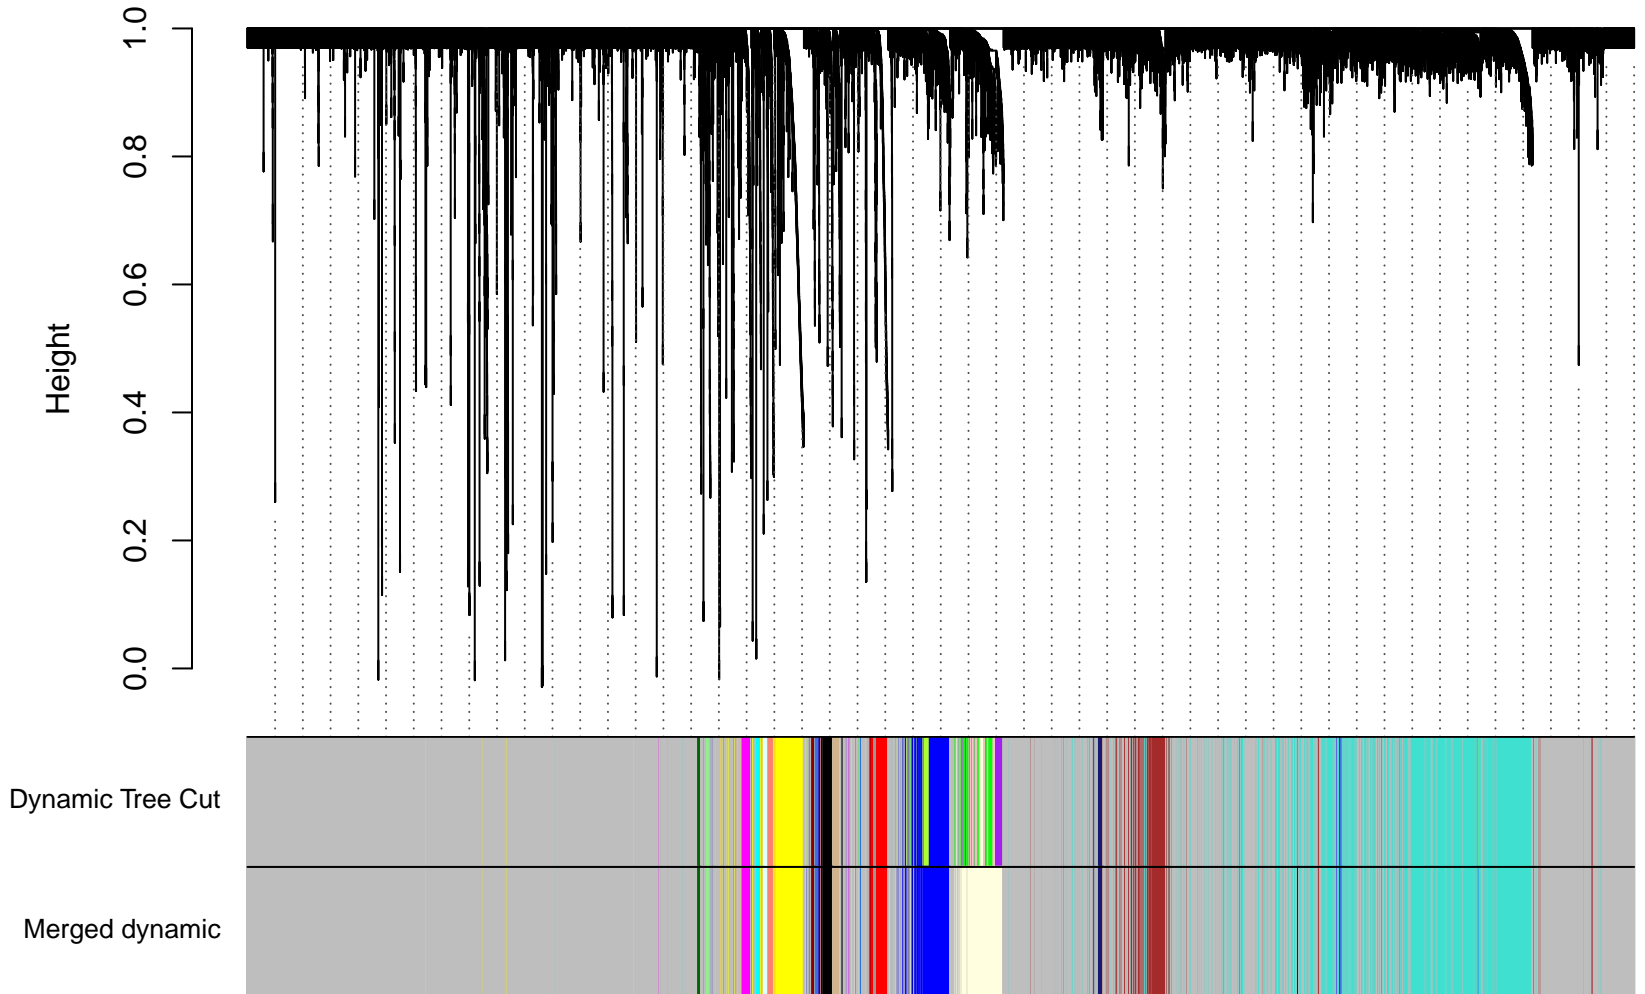

Supplement: f1 [file 6630535.f1.zip]

# Cluster Dendrogram

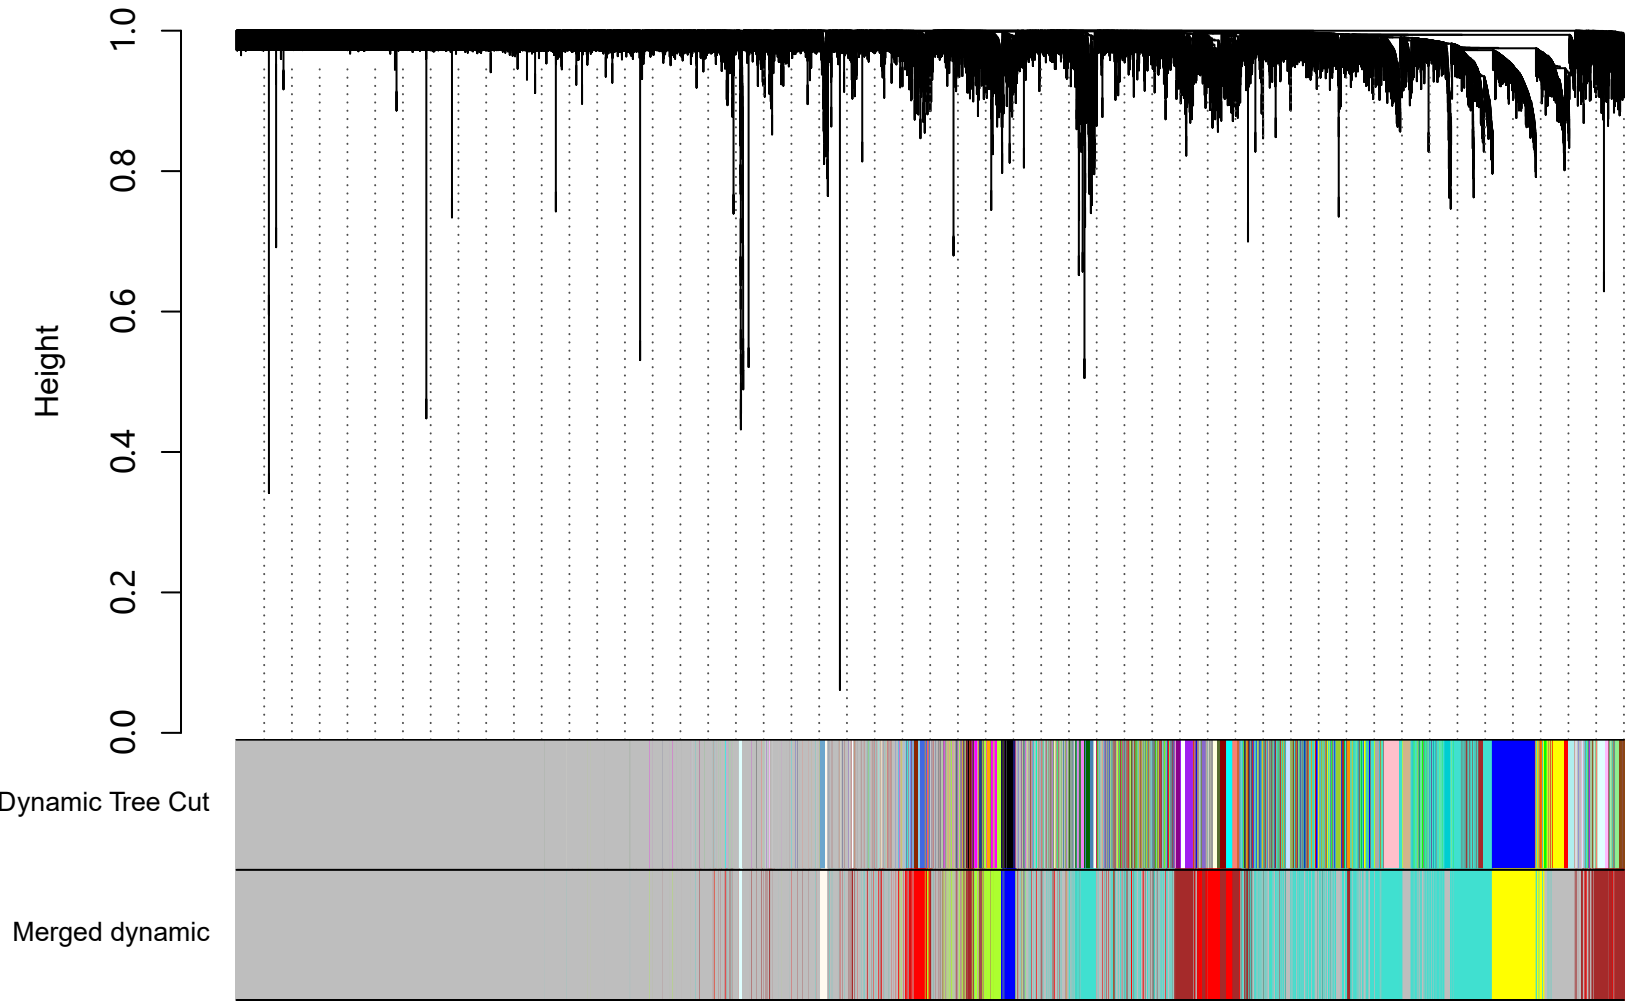

Supplement: f1 [file 6630535.f1.zip]
